# Supplementary figures and images for: Inequalities in Immunization against Maternal and Neonatal Tetanus: A Cross-Sectional Analysis of Protection at Birth Coverage Using Household Health Survey Data from 76 Countries
Source: MDPI journal article supplement (doi:10.3390/vaccines11040752), 2023-03-29

Countries that have achieved MNTE

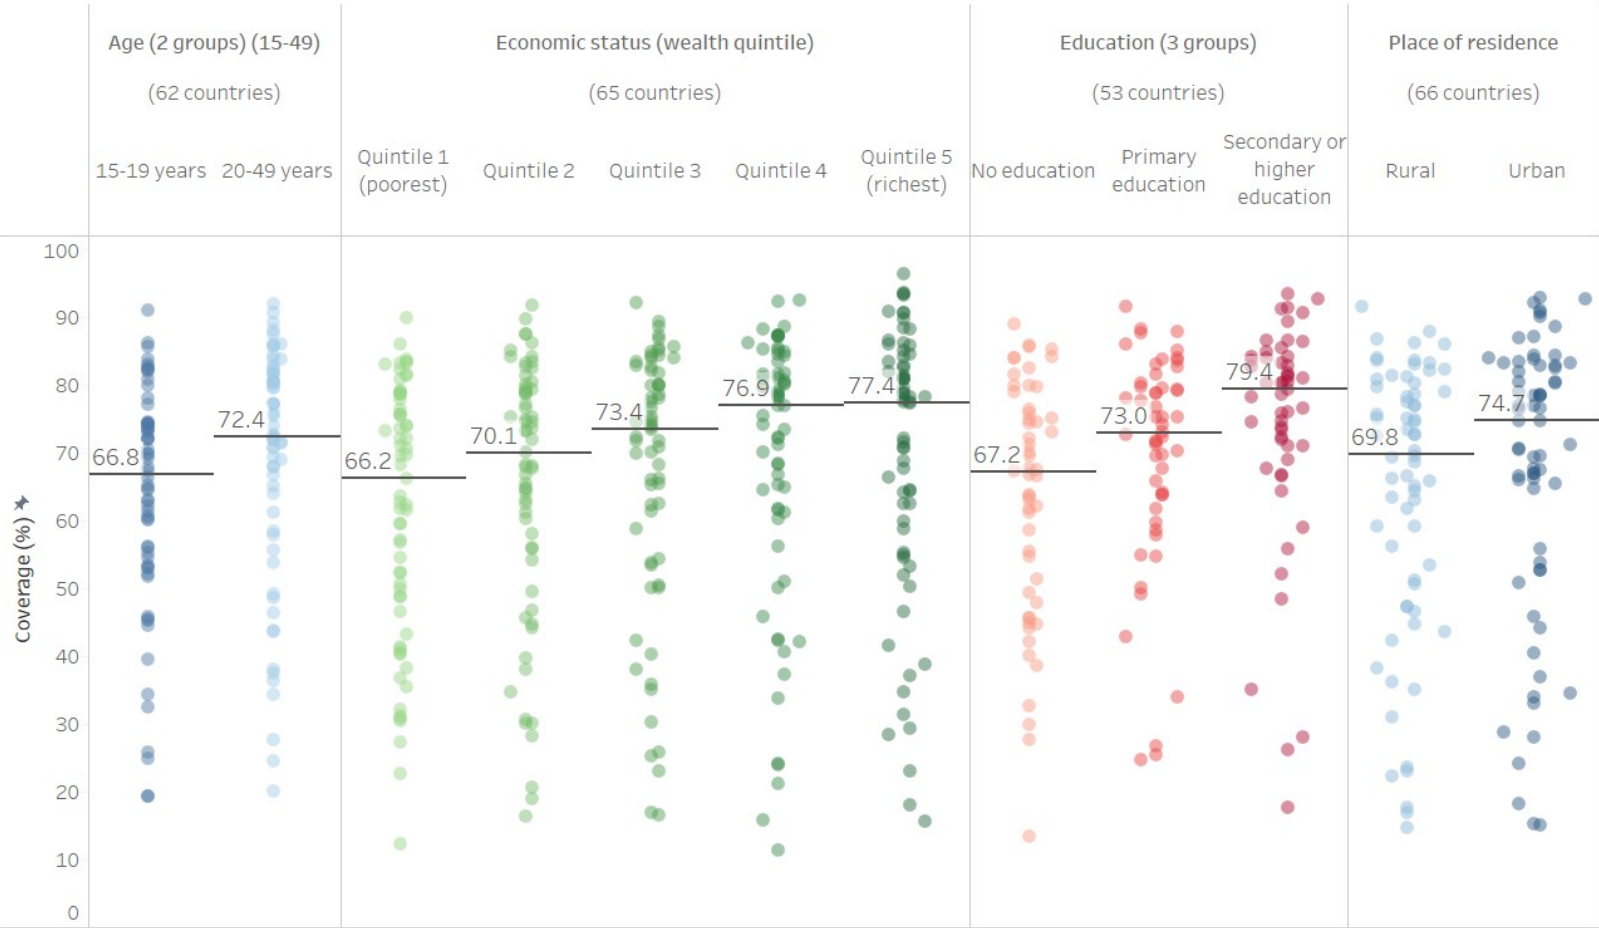

Countries that have not achieved MNTE

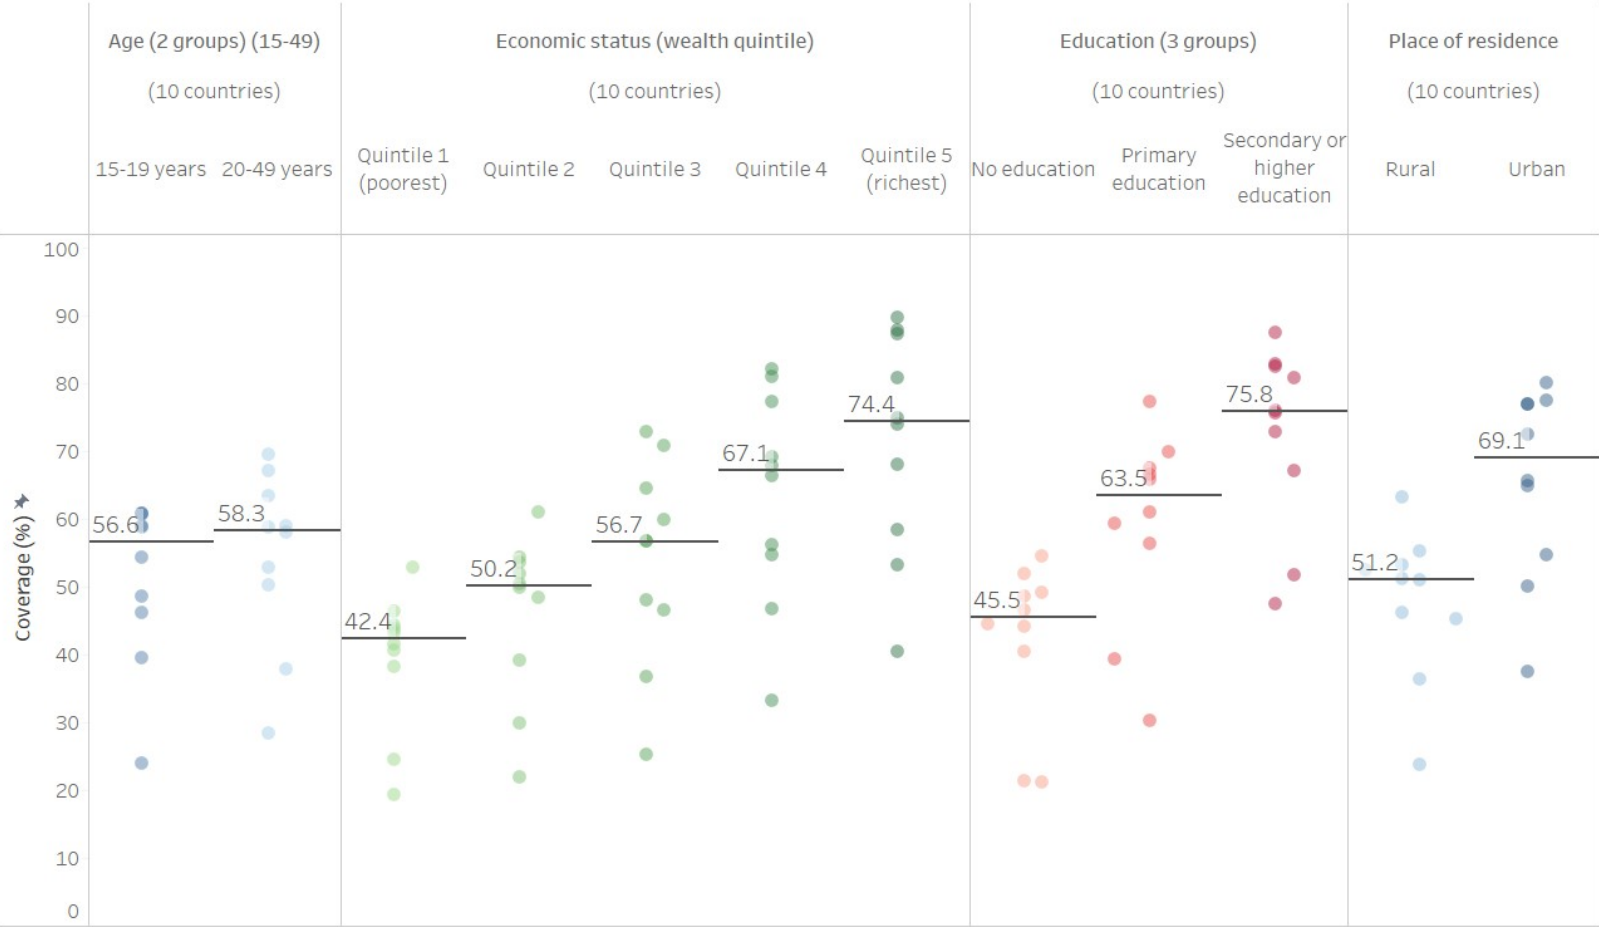

Supplement: s1 [file s1]
